# Supplementary material
Source: HighWire-hosted journal article supplement (https://bmjopen.bmj.com/content/13/1/e066883)
Supplement: inline-supplementary-material-2 [file inline-supplementary-material-2.pdf]

| CFIR Domains and the LEGS bundle                                                                                                                                      | Patients | Secondary care clinicians | GPs      |
|-----------------------------------------------------------------------------------------------------------------------------------------------------------------------|----------|---------------------------|----------|
| <b>THE LEGS BUNDLE</b>                                                                                                                                                |          |                           |          |
| Element 1: Clinical checklist                                                                                                                                         |          | X                         | X        |
| Element 2: Patient and carer education leaflet                                                                                                                        | X        | X                         | X        |
| Element 3: GP action letter                                                                                                                                           | X        | X                         | X        |
| <b>CFIR DOMAINS</b>                                                                                                                                                   |          |                           |          |
| <b>Domain 1: INTERVENTION CHARACTERISTICS</b>                                                                                                                         | <b>X</b> | <b>X</b>                  | <b>X</b> |
| <b>1.1 Intervention source:</b> Perception about whether the intervention is externally or internally developed.                                                      |          |                           |          |
| The whole bundle                                                                                                                                                      |          | X                         | X        |
| I sat down with the developers, and they gave me the background                                                                                                       |          | X                         |          |
| Perception about how the intervention was developed                                                                                                                   |          |                           | X        |
| Involving stakeholders in the development process will promote uptake                                                                                                 |          |                           | X        |
| <b>1.2 Evidence strength and quality:</b> Perceptions of the quality and validity of evidence supporting the belief that the intervention will have desired outcomes. |          |                           |          |
| Clinical checklist                                                                                                                                                    |          | X                         |          |
| Built on existing NICE guidance                                                                                                                                       |          | X                         |          |
| The guidance is vague                                                                                                                                                 |          | X                         |          |
| The guidance is clear, but we don't follow it                                                                                                                         |          | X                         |          |
| <b>1.3 Relative advantage (or not):</b> Perception of the advantage of implementing the intervention versus an alternative solution.                                  |          |                           |          |
| The whole bundle                                                                                                                                                      |          | X                         | X        |
| Improves care and outcomes                                                                                                                                            |          | X                         |          |
| Standardises a minimum quality of care                                                                                                                                |          | X                         |          |
| Allows us to make a difference to patients                                                                                                                            |          | X                         |          |
| Joins up primary and secondary care working                                                                                                                           |          |                           | X        |
| Improves awareness of NICE guidance in primary & secondary care                                                                                                       |          | X                         | X        |
| Improves awareness and understanding of PAD                                                                                                                           |          | X                         | X        |
| Clinical checklist                                                                                                                                                    |          | X                         |          |
| Builds your relationship with the patient                                                                                                                             |          | X                         |          |
| Improves medication compliance                                                                                                                                        |          | X                         |          |
| Patient and carer education leaflet                                                                                                                                   | X        | X                         | X        |
| Patients are empowered by being informed                                                                                                                              |          | X                         |          |
| I don't want any more leaflets                                                                                                                                        | X        |                           |          |
| District nurses can answer my questions                                                                                                                               | X        |                           |          |
| A conversation guide for primary care                                                                                                                                 |          |                           | X        |
| Existing relationships to reinforce the message                                                                                                                       |          |                           | X        |
| GP action letter                                                                                                                                                      |          | X                         | X        |
| A standardised letter with clear information                                                                                                                          |          | X                         |          |
| Useful for non-medical led community vascular clinics                                                                                                                 |          |                           | X        |
| Repeat GP action letter is a duplicate, adds to the workload and sets the wrong tone                                                                                  |          |                           | X        |
| It gives the impression that secondary care do not trust GPs                                                                                                          |          |                           | X        |

| CFIR Domains and the LEGS bundle                                                                                                                                                               | Patients | Secondary care clinicians | GPs |
|------------------------------------------------------------------------------------------------------------------------------------------------------------------------------------------------|----------|---------------------------|-----|
| <b>1.4 Adaptability:</b> The degree to which an intervention can be adapted, tailored, refined, or reinvented to meet local needs.                                                             |          |                           |     |
| Clinical checklist                                                                                                                                                                             |          | X                         |     |
| Adapting to the environment                                                                                                                                                                    |          | X                         |     |
| Fits the in-patient environment neatly                                                                                                                                                         |          | X                         |     |
| Incorporate into a universal admission checklist                                                                                                                                               |          | X                         |     |
| Limited access to blood pressure monitoring or cholesterol tests in out-patient clinic                                                                                                         |          | X                         |     |
| Promote checklist in primary care to be used alongside secondary care referral letter                                                                                                          |          | X                         |     |
| Patient and carer education leaflet                                                                                                                                                            | X        | X                         | X   |
| Offer personalised care and tailor patient education to individual needs                                                                                                                       |          | X                         | X   |
| A different approach for each type of patient                                                                                                                                                  |          |                           | X   |
| Different information for each patient                                                                                                                                                         |          |                           | X   |
| Existing info most likely to suit those with intermittent claudication                                                                                                                         |          |                           | X   |
| Offer realistic targets or the advice rings hollow                                                                                                                                             |          | X                         |     |
| Consider co-existing morbidities                                                                                                                                                               |          |                           | X   |
| Too much information                                                                                                                                                                           | X        |                           |     |
| Change information layout to provide summary at outset                                                                                                                                         |          | X                         |     |
| Missing information                                                                                                                                                                            | X        |                           | X   |
| Understanding what causes PAD and preventing further blockages                                                                                                                                 | X        |                           | X   |
| Managing the psychological impact of PAD                                                                                                                                                       | X        |                           |     |
| Maintaining movement and physiotherapy input                                                                                                                                                   | X        |                           |     |
| Impact on work, social and family life                                                                                                                                                         | X        |                           |     |
| Acknowledgement of reliance and impact on family                                                                                                                                               | X        |                           |     |
| Carer and family support                                                                                                                                                                       | X        |                           |     |
| Managing future risks and when to seek support                                                                                                                                                 |          | X                         | X   |
| <b>1.5 Trialability:</b> The ability to test the intervention on a small scale in the organisation, and to be able to reverse course (undo implementation) if warranted.                       |          |                           |     |
| Clinical checklist                                                                                                                                                                             | X        | X                         |     |
| A quick quality check                                                                                                                                                                          |          | X                         |     |
| Patient and carer education leaflet                                                                                                                                                            | X        | X                         |     |
| Leaflet is a resource for referring back                                                                                                                                                       | X        | X                         |     |
| <b>1.6 Complexity:</b> Perceived difficulty of implementation, reflected by duration, scope, radicalness, disruptiveness, centrality, and intricacy and number of steps required to implement. |          |                           |     |
| Clinical checklist                                                                                                                                                                             |          | X                         | X   |
| Simplicity                                                                                                                                                                                     |          | X                         |     |
| Improvements that make it even simpler                                                                                                                                                         |          | X                         |     |
| It needs to be a bit more, no and why                                                                                                                                                          |          | X                         | X   |
| GP action letter                                                                                                                                                                               | X        | X                         | X   |
| A template for new staff                                                                                                                                                                       |          | X                         |     |
| A time-consuming manual coding process with potential for error                                                                                                                                |          |                           | X   |
| Waiting times for primary care/test appointments                                                                                                                                               | X        |                           | X   |
| Difficult to assess patients remotely                                                                                                                                                          |          |                           | X   |

| CFIR Domains and the LEGS bundle                                                                                                                     | Patients | Secondary care clinicians | GPs |
|------------------------------------------------------------------------------------------------------------------------------------------------------|----------|---------------------------|-----|
| Lack of continuity                                                                                                                                   |          |                           | X   |
| 60 calls and 40 letters a day                                                                                                                        |          |                           | X   |
| Up to three months to receive hospital letters                                                                                                       |          |                           | X   |
| Patients to hand deliver letter to GP surgery                                                                                                        |          |                           | X   |
| <b>1.7 Design quality and packaging:</b> Perceived excellence in how the intervention is bundled, presented, and assembled.                          |          |                           |     |
| Clinical checklist                                                                                                                                   |          | X                         |     |
| Working across two different systems - Paper and electronic                                                                                          |          | X                         |     |
| Paper checklists tend to get missed                                                                                                                  |          | X                         |     |
| Electronic option required                                                                                                                           |          | X                         |     |
| Patient and carer education leaflet                                                                                                                  | X        | X                         | X   |
| Accessibility                                                                                                                                        | X        |                           |     |
| Stored in a safe place                                                                                                                               | X        |                           |     |
| Lost the leaflet                                                                                                                                     | X        |                           |     |
| Would be improved if available by email                                                                                                              | X        |                           |     |
| Presentation & format                                                                                                                                | X        |                           |     |
| Paper leaflet                                                                                                                                        |          | X                         |     |
| Larger print has been requested                                                                                                                      |          | X                         |     |
| Language can be hard to understand                                                                                                                   | X        |                           | X   |
| Write for a lower reading age and provide additional information or additional resources for people who are able to access more detailed information |          |                           | X   |
| Keep it simple, give less information, in different formats and in a way that is understandable                                                      |          |                           | X   |
| Avoid didactic language and reframe the approach                                                                                                     |          |                           | X   |
| There's a lot of 'do not's'                                                                                                                          |          |                           | X   |
| Ensure accuracy of information                                                                                                                       |          |                           | X   |
| Confusing dietary advice                                                                                                                             |          |                           | X   |
| Provide more infographics and pictures                                                                                                               | X        | X                         | X   |
| Include diversity in visuals (e.g., pictures of leg ulcers/skin changes in different skin colours)                                                   |          | X                         |     |
| Add web links                                                                                                                                        |          |                           | X   |
| Could be supported by existing NHS software like QRX, direct information to patient phones                                                           |          |                           | X   |
| Offer an audio and video version                                                                                                                     | X        | X                         | X   |
| Patient information to be offered as a group intervention                                                                                            | X        | X                         |     |
| Opportunity for group to be peer-led                                                                                                                 |          | X                         |     |
| GP action letter                                                                                                                                     |          |                           | X   |
| Same information and same system across primary and secondary care                                                                                   |          |                           | X   |
| Include information on the discussion around contraindications and side effects of any newly prescribed medication with patient                      |          |                           | X   |
| Any contraindications primary care should be aware of, useful for clarification                                                                      |          |                           | X   |
| Offered and accepted/declined smoking cessation referral                                                                                             |          |                           | X   |
| Provide a clear plan for if the situation deteriorates                                                                                               |          |                           | X   |
| Copy of letter to patient – shared message – reinforcement                                                                                           |          |                           | X   |

| CFIR Domains and the LEGS bundle                                                                                                                               | Patients | Secondary care clinicians | GPs |
|----------------------------------------------------------------------------------------------------------------------------------------------------------------|----------|---------------------------|-----|
| <b>1.8 Cost:</b> Costs of the intervention and costs associated with implementing that intervention including investment, supply, and opportunity costs.       |          |                           | X   |
| It is not commissioned or financially viable                                                                                                                   |          |                           | X   |
| Primary care time                                                                                                                                              |          |                           | X   |
| Maintaining equipment                                                                                                                                          |          |                           | X   |
| <b>Domain 2: OUTER SETTING</b>                                                                                                                                 | X        | X                         | X   |
| <b>2.1 Patient needs and resources:</b> The extent to which patient needs, as well as barriers and facilitators to meet those needs are known and prioritised. |          |                           |     |
| The whole bundle                                                                                                                                               | X        | X                         | X   |
| Working as part of a whole team                                                                                                                                |          |                           | X   |
| Promoting joined up working across primary and secondary care                                                                                                  |          | X                         | X   |
| Enabling specialist care from different people                                                                                                                 |          |                           | X   |
| Expectations and understanding of each other's roles                                                                                                           |          |                           | X   |
| Timely access back into secondary care if needed                                                                                                               |          |                           | X   |
| Secondary care oversight                                                                                                                                       |          |                           | X   |
| Accessible referral pathway                                                                                                                                    | X        |                           | X   |
| We can't make a referral anyway                                                                                                                                |          |                           | X   |
| Secondary care referral thresholds too high                                                                                                                    |          |                           | X   |
| You don't fit the criteria so wait until it gets worse                                                                                                         |          |                           | X   |
| Delayed referral to secondary care                                                                                                                             | X        | X                         | X   |
| Presenting too late                                                                                                                                            |          | X                         |     |
| Can I do some of the diagnostics in the community?                                                                                                             |          |                           | X   |
| Time wastage                                                                                                                                                   |          | X                         | X   |
| A geographical consideration                                                                                                                                   | X        |                           | X   |
| Locality of secondary care services                                                                                                                            | X        |                           | X   |
| Transport needs                                                                                                                                                | X        |                           | X   |
| Clinical checklist                                                                                                                                             |          | X                         | X   |
| Use in primary care to start best medical therapy                                                                                                              |          | X                         |     |
| Would promote earlier conversations with patients in primary care                                                                                              |          | X                         |     |
| Use at point of admission and discharge for in-patients                                                                                                        |          | X                         |     |
| Adapt for primary care to support referral                                                                                                                     |          |                           | X   |
| Patient and carer education leaflet                                                                                                                            | X        | X                         | X   |
| Patient education provided too late                                                                                                                            | X        | X                         |     |
| Too far gone to talk about lifestyle modification                                                                                                              |          | X                         |     |
| Level of functioning & mobility - I can only do what I can do                                                                                                  | X        |                           |     |
| It is crucial whenever it happens                                                                                                                              |          | X                         |     |
| Introduced sooner in primary care as part of a PAD prevention programme                                                                                        |          |                           | X   |
| Informing patients to reduce the chance of presenting late/in crisis                                                                                           |          |                           | X   |
| Managing patient expectations                                                                                                                                  |          |                           | X   |
| <b>2.2 Cosmopolitanism:</b> The degree to which an organisation is networked with other external organisations.                                                |          |                           |     |
| The whole bundle                                                                                                                                               |          | X                         |     |
| Shared primary & secondary care working                                                                                                                        |          | X                         |     |
| Patient and carer education leaflet                                                                                                                            |          |                           | X   |

| CFIR Domains and the LEGS bundle                                                                                                                                                                                                                                                                                             | Patients | Secondary care clinicians | GPs |
|------------------------------------------------------------------------------------------------------------------------------------------------------------------------------------------------------------------------------------------------------------------------------------------------------------------------------|----------|---------------------------|-----|
| Copy of leaflet to primary care to reiterate message                                                                                                                                                                                                                                                                         |          |                           | X   |
| GP action letter                                                                                                                                                                                                                                                                                                             |          | X                         |     |
| Clear open communication across community and hospital services                                                                                                                                                                                                                                                              |          | X                         |     |
| Joined up clinical record systems                                                                                                                                                                                                                                                                                            |          | X                         |     |
| We don't sing off the same hymn sheet                                                                                                                                                                                                                                                                                        |          | X                         |     |
| <b>2.3 External policies and incentives:</b> A broad construct that includes external strategies to spread interventions including policy and regulations (governmental or other central entity), external mandates, recommendations and guidelines, pay-for-performance, collaboratives, and public or benchmark reporting. |          |                           |     |
| The whole bundle                                                                                                                                                                                                                                                                                                             |          | X                         |     |
| Additional funding                                                                                                                                                                                                                                                                                                           |          | X                         |     |
| <b>Domain 3: INNER SETTING</b>                                                                                                                                                                                                                                                                                               | X        | X                         | X   |
| <b>3.1 Structural characteristics:</b> The social architecture, age, maturity, and size of an organisation.                                                                                                                                                                                                                  |          |                           |     |
| The whole bundle                                                                                                                                                                                                                                                                                                             |          | X                         | X   |
| Impact of staff shortages                                                                                                                                                                                                                                                                                                    |          | X                         |     |
| Reduced staffing due to covid                                                                                                                                                                                                                                                                                                |          | X                         |     |
| Involving the multi-disciplinary team                                                                                                                                                                                                                                                                                        |          |                           | X   |
| GP action letter                                                                                                                                                                                                                                                                                                             |          | X                         | X   |
| Time delay between writing and getting to primary care                                                                                                                                                                                                                                                                       |          | X                         | X   |
| Patient and carer education leaflet                                                                                                                                                                                                                                                                                          | X        | X                         | X   |
| Being able to follow the advice                                                                                                                                                                                                                                                                                              | X        | X                         |     |
| Difficulty ordering repeat medication                                                                                                                                                                                                                                                                                        | X        |                           |     |
| Relying on others for food shopping                                                                                                                                                                                                                                                                                          | X        |                           |     |
| Availability of supervised exercise                                                                                                                                                                                                                                                                                          |          | X                         |     |
| It's easy to bombard somebody with information                                                                                                                                                                                                                                                                               |          |                           | X   |
| <b>3.2 Networks and communications:</b> The nature and quality of webs of social networks and the nature and quality of formal and informal communications within an organisation.                                                                                                                                           |          |                           |     |
| The whole bundle                                                                                                                                                                                                                                                                                                             | X        | X                         | X   |
| A team approach                                                                                                                                                                                                                                                                                                              |          | X                         |     |
| Building relationships                                                                                                                                                                                                                                                                                                       |          |                           | X   |
| Clear communication                                                                                                                                                                                                                                                                                                          |          |                           | X   |
| The patient is in the middle                                                                                                                                                                                                                                                                                                 |          |                           | X   |
| Involve all multi-disciplinary professionals (including pharmacists, nurses, physios)                                                                                                                                                                                                                                        |          | X                         |     |
| Access to the vascular team or not                                                                                                                                                                                                                                                                                           | X        |                           | X   |
| Advice and information                                                                                                                                                                                                                                                                                                       | X        |                           | X   |
| <b>3.3 Culture:</b> Norms, values, and basic assumptions of a given organisation.                                                                                                                                                                                                                                            |          |                           |     |
| The whole bundle                                                                                                                                                                                                                                                                                                             |          | X                         |     |
| Target patients earlier                                                                                                                                                                                                                                                                                                      |          | X                         |     |
| The gap in no man's land                                                                                                                                                                                                                                                                                                     |          | X                         |     |
| <b>3.4 Implementation climate - tension for change:</b> The degree to which stakeholders perceive the current situation as intolerable or needing change.                                                                                                                                                                    |          |                           |     |
| The whole bundle                                                                                                                                                                                                                                                                                                             |          | X                         | X   |
| Primary care needs to do more sooner                                                                                                                                                                                                                                                                                         |          | X                         |     |
| Secondary care referral threshold is too high                                                                                                                                                                                                                                                                                |          |                           | X   |
| <b>3.5 Implementation climate - Compatibility:</b> The degree of tangible fit between meaning and values attached to the intervention by involved individuals, how those align with individuals' own norms, values, and                                                                                                      |          |                           |     |

| CFIR Domains and the LEGS bundle                                                                                                                                                                           | Patients | Secondary care clinicians | GPs |
|------------------------------------------------------------------------------------------------------------------------------------------------------------------------------------------------------------|----------|---------------------------|-----|
| perceived risks and needs, and how the intervention fits with existing workflows and systems.                                                                                                              |          |                           |     |
| The whole bundle                                                                                                                                                                                           |          |                           | X   |
| Existing systems in place for primary care medication management and monitoring                                                                                                                            |          |                           | X   |
| Provide 28 days medication to allow for delay in seeing GP                                                                                                                                                 |          |                           | X   |
| Preventative medicine and health promotion is core to primary care practice                                                                                                                                |          |                           | X   |
| Ability to offer smoking cessation support                                                                                                                                                                 |          |                           | X   |
| Local variation in set-up of smoking cessation, dietary advice, exercise therapy                                                                                                                           |          |                           | X   |
| No formal set-up in primary care to pick it up                                                                                                                                                             |          |                           | X   |
| GP relationship with patients                                                                                                                                                                              |          |                           |     |
| Not commissioned                                                                                                                                                                                           |          |                           |     |
| Secondary care to initiate smoking cessation referral                                                                                                                                                      |          |                           | X   |
| National protocol for weight reduction                                                                                                                                                                     |          |                           | X   |
| Existing relationships with Diabetes nurses/clinics                                                                                                                                                        |          |                           | X   |
| <b>3.6 Implementation climate - Relative priority:</b> Individuals' shared perception of the importance of the implementation within the organisation.                                                     |          |                           |     |
| Clinical checklist                                                                                                                                                                                         |          | X                         |     |
| Take the opportunity                                                                                                                                                                                       |          | X                         |     |
| It shouldn't be seen as an extra thing                                                                                                                                                                     |          | X                         |     |
| A threat to autonomy                                                                                                                                                                                       |          | X                         |     |
| Checklists are tick-box exercises rather than safety mechanisms                                                                                                                                            |          | X                         |     |
| <b>3.7 Implementation climate - Learning climate</b>                                                                                                                                                       |          |                           |     |
| The whole bundle                                                                                                                                                                                           |          |                           | X   |
| Two-way learning                                                                                                                                                                                           |          |                           | X   |
| Secondary care can learn from this too                                                                                                                                                                     |          |                           | X   |
| Holistic picture of medication profile, side effects, competing medication                                                                                                                                 |          |                           | X   |
| Teams are not static so require ongoing access to training                                                                                                                                                 |          | X                         | X   |
| <b>3.8 Readiness for implementation – leadership engagement:</b> Commitment, involvement, and accountability of leaders and managers with the implementation.                                              |          |                           |     |
| The whole package                                                                                                                                                                                          |          | X                         |     |
| Provide a named leader                                                                                                                                                                                     |          | X                         |     |
| External oversight is preferable                                                                                                                                                                           |          | X                         |     |
| <b>3.9 Readiness for implementation – available resources:</b> The level of resources dedicated for implementation and on-going operations including money, training, education, physical space, and time. |          |                           |     |
| Clinical checklist                                                                                                                                                                                         |          | X                         | X   |
| Checklists are quick                                                                                                                                                                                       |          | X                         |     |
| Managing it alongside the burden of work                                                                                                                                                                   |          | X                         |     |
| The assumption that the GP will sort it – putting it back into GP land                                                                                                                                     |          | X                         | X   |
| Lack of access to testing equipment in community                                                                                                                                                           |          |                           | X   |
| Limited community workforce (i.e., reduced number of district nurses) capacity for conducting ABPIs                                                                                                        |          |                           | X   |
| Secondary care are gatekeepers for ABPIs and duplexes                                                                                                                                                      |          |                           | X   |

| CFIR Domains and the LEGS bundle                                                                                                                                                                         | Patients | Secondary care clinicians | GPs |
|----------------------------------------------------------------------------------------------------------------------------------------------------------------------------------------------------------|----------|---------------------------|-----|
| Waiting for secondary care to make diagnosis                                                                                                                                                             |          |                           | X   |
| Patient and carer education leaflet                                                                                                                                                                      |          | X                         |     |
| Time to talk requires extra staff                                                                                                                                                                        |          | X                         |     |
| GP action letter                                                                                                                                                                                         |          | X                         | X   |
| Time burden and impact of dictating long clinic letters                                                                                                                                                  |          | X                         |     |
| Joining it up - We've done our bit and now pass it on to the GP                                                                                                                                          |          |                           | X   |
| Routine practice or adding to the workload                                                                                                                                                               |          |                           | X   |
| Feels top down and with didactic language                                                                                                                                                                |          |                           | X   |
| Keep the GP onside and change phraseology                                                                                                                                                                |          |                           | X   |
| <b>3.10 Readiness for implementation - access to information and knowledge:</b> Ease of access to digestible information and knowledge about the intervention and how to incorporate it into work tasks. |          |                           |     |
| The whole bundle                                                                                                                                                                                         |          | X                         |     |
| Training on the purpose of the intervention                                                                                                                                                              |          | X                         |     |
| Written information for those unable to attend training                                                                                                                                                  |          | X                         |     |
| Prioritise training and supervision for junior staff – the people who do the day-to-day work                                                                                                             |          | X                         |     |
| Consider involving medical students                                                                                                                                                                      |          | X                         |     |
| Highlight the link between PAD and cardiovascular death                                                                                                                                                  |          | X                         |     |
| Education on managing CLTI and Non-CLTI patients in primary care                                                                                                                                         |          | X                         |     |
| Knowing the risk factors for CLTI and how to make a referral to secondary care                                                                                                                           |          | X                         |     |
| Taking an ABPI in primary care                                                                                                                                                                           |          | X                         | X   |
| Support the triage for secondary care                                                                                                                                                                    |          |                           | X   |
| We're not commissioned to do it                                                                                                                                                                          |          |                           | X   |
| Visibility of vascular teams at primary care conferences                                                                                                                                                 |          | X                         |     |
| Learning on the job                                                                                                                                                                                      |          | X                         | X   |
| Informal training to colleagues i.e., when seeing a medical outlier                                                                                                                                      |          | X                         |     |
| Use available supervision/debriefing opportunities                                                                                                                                                       |          |                           | X   |
| Webinar-ed out                                                                                                                                                                                           |          | X                         |     |
| Training delivered by vascular team to primary care                                                                                                                                                      |          |                           | X   |
| Collaborative working and building relationships                                                                                                                                                         |          |                           | X   |
| We don't ever see secondary care specialists                                                                                                                                                             |          |                           | X   |
| Involve all primary care staff and not just GPs                                                                                                                                                          |          |                           | X   |
| Learning gap in exercise and lifestyle modification                                                                                                                                                      |          |                           | X   |
| <b>DOMAIN 4: CHARACTERISTICS OF INDIVIDUALS</b>                                                                                                                                                          |          |                           |     |
| The whole bundle                                                                                                                                                                                         | X        | X                         | X   |
| Taking on the advice                                                                                                                                                                                     | X        | X                         | X   |
| Familiarity and understanding of PAD                                                                                                                                                                     |          | X                         | X   |
| <b>4.1 Knowledge and beliefs about the intervention</b>                                                                                                                                                  |          |                           |     |
| Clinical checklist                                                                                                                                                                                       |          | X                         | X   |
| Prioritising the checklist (or not)                                                                                                                                                                      |          | X                         |     |
| Previous experience of using checklists and identifying benefits                                                                                                                                         |          | X                         |     |
| Checklists are a useful memory prompt                                                                                                                                                                    |          | X                         |     |
| Patient and carer education leaflet                                                                                                                                                                      | X        |                           |     |

| CFIR Domains and the LEGS bundle                                                                                                                                                | Patients | Secondary care clinicians | GPs |
|---------------------------------------------------------------------------------------------------------------------------------------------------------------------------------|----------|---------------------------|-----|
| Targets that are impossible to reach                                                                                                                                            | X        |                           |     |
| <b>4.2 Self-efficacy</b>                                                                                                                                                        |          |                           |     |
| The whole bundle                                                                                                                                                                |          | X                         |     |
| Confidence to implement guidelines                                                                                                                                              |          | X                         |     |
| <b>4.3 Individual stage of change</b>                                                                                                                                           |          |                           |     |
| Clinical checklist                                                                                                                                                              |          | X                         |     |
| Put myself forward to find out more                                                                                                                                             |          | X                         |     |
| Patient and carer education leaflet                                                                                                                                             | X        | X                         | X   |
| If I was younger and I had more get-up-and-go                                                                                                                                   | X        |                           |     |
| It's down to willpower at the end of the day (I like smoking, I like drinking, I like the telly) – patient engagement & stage of change – resistance from patients              | X        | X                         | X   |
| The only thing left is something nice to eat                                                                                                                                    | X        |                           |     |
| Resistance from patients                                                                                                                                                        |          | X                         |     |
| Secondary care doctors tell people to do things                                                                                                                                 |          |                           | X   |
| Everybody knows they need to stop smoking                                                                                                                                       |          |                           | X   |
| <b>4.4 Individual identification with organisation:</b> how individuals perceive the organization and their relationship and degree of commitment with that organisation.       |          |                           |     |
| The whole bundle                                                                                                                                                                |          | X                         |     |
| Joined up working with primary care                                                                                                                                             |          | X                         |     |
| Patient and carer education leaflet                                                                                                                                             | X        | X                         | X   |
| The patient – health professional relationship                                                                                                                                  | X        | X                         |     |
| It takes time to build the relationship and have the conversation                                                                                                               |          | X                         |     |
| Clear open communication                                                                                                                                                        | X        |                           |     |
| Frank conversations for some                                                                                                                                                    | X        | X                         |     |
| Be honest and explain the risks                                                                                                                                                 |          | X                         |     |
| Information on the benefits versus taking pleasure away                                                                                                                         |          | X                         |     |
| Striking a balance to optimise people's quality of life. You can't take everything away.                                                                                        |          | X                         |     |
| Patient preferences and shared decision making                                                                                                                                  |          | X                         |     |
| Online tools to support the clinical conversation                                                                                                                               |          | X                         |     |
| Language and approach used to engage people                                                                                                                                     |          |                           | X   |
| Consider use of motivational interviewing techniques in secondary care                                                                                                          |          |                           | X   |
| GP action letter                                                                                                                                                                |          |                           | X   |
| Partnership working                                                                                                                                                             |          |                           | X   |
| Avoid the extra step and order the test in secondary care                                                                                                                       |          |                           | X   |
| <b>4.5 Other personal attributes:</b> other personal traits such as tolerance of ambiguity, intellectual ability, motivation, values, competence, capacity, and learning style. |          |                           |     |
| Clinical checklist                                                                                                                                                              |          | X                         |     |
| Team members who prioritise PAD                                                                                                                                                 |          | X                         |     |
| Patient and carer education leaflet                                                                                                                                             | X        |                           |     |
| Living with other health conditions alongside (arthritis, diabetes)                                                                                                             | X        |                           |     |
| Managing the pain                                                                                                                                                               | X        |                           |     |
| Medication side-effects                                                                                                                                                         | X        |                           |     |



| CFIR Domains and the LEGS bundle                                                                                                                                                                                                            | Patients | Secondary care clinicians | GPs |
|---------------------------------------------------------------------------------------------------------------------------------------------------------------------------------------------------------------------------------------------|----------|---------------------------|-----|
| <b>DOMAIN 5: PROCESS</b>                                                                                                                                                                                                                    |          |                           |     |
| <b>5.1 Engaging:</b> Attracting and involving appropriate individuals in the implementation and use of the intervention through a combined strategy of social marketing, education, role modelling, training, and other similar activities. |          |                           |     |
| The whole bundle                                                                                                                                                                                                                            |          | X                         |     |
| Championing the cause                                                                                                                                                                                                                       |          | X                         |     |
| Doing the bare minimum and going home on time                                                                                                                                                                                               |          | X                         |     |
| Using research to demonstrate a difference                                                                                                                                                                                                  |          | X                         |     |
| Involving stakeholders at an early stage                                                                                                                                                                                                    |          | X                         |     |
| Clinical checklist                                                                                                                                                                                                                          |          | X                         |     |
| Posters in clinic to remind staff                                                                                                                                                                                                           |          | X                         |     |
| <b>5.2 Executing:</b> Carrying out or accomplishing the implementation according to plan.                                                                                                                                                   |          |                           |     |
| Patient and carer education leaflet                                                                                                                                                                                                         | X        |                           |     |
| A direct contact number for the vascular team                                                                                                                                                                                               | X        |                           |     |
| Primary care capacity                                                                                                                                                                                                                       | X        |                           |     |
| My GP and practice nurses keep an eye on me                                                                                                                                                                                                 | X        |                           |     |
| Sometimes it can take weeks to get them to answer a query over the phone                                                                                                                                                                    | X        |                           |     |
| GP action letter                                                                                                                                                                                                                            | X        |                           |     |
| It can take weeks to get information on their system                                                                                                                                                                                        | X        |                           |     |
| It's lots of different clinics and different people involved in your healthcare (whole person care)                                                                                                                                         | X        |                           |     |

### CFIR matrix and distribution of descriptive themes
