# Supplementary material
Source: HighWire-hosted journal article supplement (https://bmjopen.bmj.com/content/13/1/e066883)
Supplement: inline-supplementary-material-3 [file inline-supplementary-material-3.pdf]

## Full coding framework

### Theme 1: The potential to make a difference

#### 1.1 An opportunity to meet patient need

- 1.1.1 *Improves care and outcomes*
  - 1.1.1.1 *Standardises a minimum quality of care*
- 1.1.2 *Improves awareness and understanding of PAD*
- 1.1.3 *Improves awareness of existing NICE guidance*
  - 1.1.3.1 *Provides a tool to support implementation of NICE guidance*
    - 1.1.3.1.1 *The guidance is clear but we don't always follow it*
- 1.1.4 *Builds your relationship with the patient*
  - 1.1.4.1 *Empowers patients by being informed*

#### 1.2 Shared primary and secondary care working

- 1.2.1 *Working as a part of a whole team*
  - 1.2.1.1 *Allows for secondary care oversight*
  - 1.2.1.2 *An opportunity for collaborative working*
    - 1.2.1.2.1 *Managing expectations and understanding each other's roles*
    - 1.2.1.2.2 *We don't sing off the same hymn sheet*
      - 1.2.1.2.2.1 *The patient is in the middle*
  - 1.2.1.3 *Multidisciplinary working*
    - 1.2.1.3.1 *Enabling specialist care from different people*
  - 1.2.1.4 *Promoting continuity of care*
    - 1.2.1.4.1 *There's lots of different clinics and different people involved in your care*
    - 1.2.1.4.2 *Timely access back into secondary care if needed*
- 1.2.2 *Joining up and building relationships across the team*
  - 1.2.2.1 *We don't ever see secondary care specialists*
  - 1.2.2.2 *Access to the vascular team (or not)*
    - 1.2.2.2.1 *A direct contact number for the vascular team*
- 1.2.3 *We've done our bit and now it's over to the GP*
- 1.2.4 *Clear open communication across community and hospital services*
- 1.2.5 *Working together and learning together*
  - 1.2.5.1 *An opportunity for two-way learning*
    - 1.2.5.1.1 *Secondary care can learn from this too*
      - 1.2.5.1.1.1 *Support for screening questions on prescribing and contraindications*
        - 1.2.5.1.1.1.1 *Holistic picture of medication profile, side effects, competing medication*
        - 1.2.5.1.1.1.2 *Familiarity (or not) with reviewing cholesterol and HbA1c's – it's a GP thing*

### Theme 2: A solution for addressing the gap in no man's land

#### 2.1 We need to target patients earlier

- 2.1.1 *Patients presenting too late*
  - 2.1.1.1 *Delayed referral to secondary care*
    - 2.1.1.1.1 *We can't make a referral anyway*
      - 2.1.1.1.1.1 *Secondary care referral thresholds are too high*
        - 2.1.1.1.1.1.1 *Patients don't meet the criteria so have to wait until it gets worse*
  - 2.1.1.2 *Waiting for secondary care to make the diagnosis*
    - 2.1.1.2.1 *Support general practice to do some of the diagnostics*
      - 2.1.1.2.1.1 *Lack of access to testing equipment in the community*
      - 2.1.1.2.1.2 *Secondary care are gatekeepers for ABPIs and duplexes*

#### 2.2 Primary care needs to do more sooner

- 2.2.1 *Adapt for use in general practice as part of a PAD prevention programme*

- 2.2.1.1 *Would promote earlier conversations with patients*
- 2.2.1.2 *Useful for managing patient expectations*
- 2.2.1.3 *Would support primary care to start best medical therapy*
- 2.2.1.4 *Could be used to provide additional information for referral to vascular team*
- 2.2.1.4.1 *Would support triage in secondary care*
- 2.2.2 *Use as an ongoing conversation guide*
- 2.2.2.1 *Existing relationships with patients will help to reinforce the message*
- 2.2.2.2 *Informing patients reduces the chance of presenting late or in crisis*

### **Theme 3: Prioritising and making it happen**

#### **3.1 Prioritising alongside the burden of work**

- 3.1.1 *It shouldn't be seen as an extra thing*
- 3.1.1.1 *Previous experience of using intervention/checklists*
- 3.1.1.2 *Checklists are a quick quality check*
- 3.1.1.3 *Checklists are a useful memory prompt*
- 3.1.1.4 *Checklists are a threat to autonomy*
- 3.1.1.5 *Checklists are tick-box exercises rather than safety mechanisms*
- 3.1.2 *Confidence to implement guidelines*
- 3.1.2.1 *It's essentially what I always do*
- 3.1.3 *It takes time to build the relationship and have the conversation*
- 3.1.3.1 *Time to talk requires extra staff*
- 3.1.3.2 *Time burden of dictating long clinic letters*
- 3.1.3.3 *Limited access to blood patient monitoring and cholesterol tests in out-patient clinics*
- 3.1.4 *Impact of staff shortages*
- 3.1.4.1 *Reduced staffing due to covid*
- 3.1.4.2 *Reduced district nurse staffing for conducting ABPIs*
- 3.1.5 *Primary care is not an infinite resource*
- 3.1.5.1 *Long waiting times to be seen or to get tests*
- 3.1.5.1.1 *Sometimes it can take weeks to get them to answer a query over the phone*
- 3.1.5.2 *Sixty calls and forty letters a day*
- 3.1.5.3 *Patients don't always see the same GP*
- 3.1.5.4 *Championing the cause or doing the bare minimum and going home on time*
- 3.1.5.4.1 *Using research to demonstrate a difference*

#### **3.2 Working across primary and secondary care systems**

- 3.2.1 *Preventative medicine and health promotion is core to primary care practice*
- 3.2.1.1 *Existing systems in place for primary care medication management and monitoring*
- 3.2.1.1.1 *It can take weeks to get information on the system*
- 3.2.1.1.2 *Time delay between writing and receiving clinic letters*
- 3.2.1.1.3 *It can take up to three months to receive hospital letters*
- 3.2.1.1.3.1 *Provide 28 days medication to allow for delay in seeing GP*
- 3.2.1.1.3.2 *Patient difficulty ordering repeat medication*
- 3.2.1.1.4 *Avoid the extra step and order the test in secondary care*
- 3.2.1.1.5 *Secondary care to initiate smoking cessation referral*
- 3.2.1.1.5.1 *Local variation in community set-up of smoking cessation, dietary advice, exercise therapy support*
- 3.2.1.1.5.1.1 *No formal set-up in primary care to pick it up*
- 3.2.1.1.5.1.2 *Link with national protocol for weight reduction*
- 3.2.1.1.6 *It's not commissioned or financially viable*
- 3.2.2 *Provide a copy of the clinic/GP letter to the patient to reinforce shared messaging*
- 3.2.2.1 *Patients to hand deliver letters to general practice*
- 3.2.3 *Repeat GP action letter is a duplicate, adds to the workload, and sets the wrong tone*
- 3.2.3.1 *It gives the impression that secondary care do not trust GPs*

### **3.3 Adapting the intervention to the environment**

#### *3.3.1 Fits the in-patient environment neatly*

##### *3.3.1.1 Incorporate into a universal admission/discharge bundle*

###### *3.3.1.1.1 Use at point of admission and discharge for in-patients*

#### *3.3.2 Use the intervention to support the outpatient clinic consultation*

##### *3.3.2.1 A record of the consultation conversation*

###### *3.3.2.2 A resource for referring back*

#### *3.3.3 Complexity in assessing patients remotely in the community*

### **3.4 Training to support implementation**

#### *3.4.1 Teams are not static so require ongoing access to training*

##### *3.4.1.1 Prioritise junior staff – the people who do the day-to-day work*

###### *3.4.1.1.1 Consider including medical students*

##### *3.4.1.2 Written information for those unable to attend training*

###### *3.4.1.3 Webinar-ed out*

#### *3.4.2 Training delivered by vascular team to primary care*

##### *3.4.2.1 Involve all primary care staff and not just GPs*

###### *3.4.2.1.1 Highlight the link between PAD and cardiovascular death*

###### *3.4.2.1.2 Provide education on managing CLTI and non-CLTI patients in primary care*

###### *3.4.2.1.3 Taking an ABPI in primary care*

###### *3.4.2.1.4 Learning gaps in exercise and lifestyle modification*

##### *3.4.2.2 Visibility of vascular teams at primary care conferences*

##### *3.4.2.3 Use available supervision and de-briefing opportunities*

## **Theme 4: Personalised information and supportive conversations for taking on the advice**

### **4.1 Offer personalised care and tailor patient information to individual needs**

#### *4.1.1 Existing information does not suit all*

##### *4.1.1.1 Currently most likely to suit those with IC*

##### *4.1.1.2 Targets are impossible to reach*

###### *4.1.1.2.1 If I was younger and had more get-up-and-go*

###### *4.1.1.2.2 Availability of supervised exercise*

###### *4.1.1.2.3 Relying on others for food shopping*

#### *4.1.2 A different approach for each patient*

#### *4.1.3 Offer realistic targets or the advice rings hollow*

#### *4.1.4 Patient education leaflet is provided too late*

##### *4.1.4.1 Too far gone to talk about lifestyle modification*

###### *4.1.4.1.1 I can only do what I can do*

##### *4.1.4.2 Consider co-existing morbidities*

##### *4.1.4.3 Offer advice on moderating activity levels and pain management*

##### *4.1.4.4 Discuss concerns about medication side-effects*

### **4.2 Everyone knows they need to stop smoking**

#### *4.2.1 Acknowledge and support patient preference and promote shared decision making*

##### *4.2.1.1 It's easy to bombard someone with information*

##### *4.2.1.2 Secondary care doctors tell people to do things*

###### *4.2.1.2.1 Consider the language and approach to engage patients*

###### *4.2.1.2.2 Be honest and explain the risks*

###### *4.2.1.2.2.1 Use available online tools to support the conversation*

###### *4.2.1.2.3 Use motivational interviewing techniques*

###### *4.2.1.2.4 Frank conversations for some*

#### *4.2.2 It's down to willpower at the end of the day*

##### *4.2.2.1 I like smoking, I like drinking, I like the telly*

*4.2.2.2 The only thing left is something nice to eat*

*4.2.2.2.1 Provide information on the benefits versus taking pleasure away*

*4.2.2.2.2 Strike a balance to optimise people's quality of life*

*4.2.2.2.2.1 You can't take everything away*

*4.2.3 Patient education leaflets are not the best way for everyone*

*4.2.3.1 I don't want any more leaflets*

*4.2.3.1.1 District nurses can answer my questions*
